# Supplementary material for: Possibilities and limitations of convolutional neural network machine learning architectures in the characterisation of achiral orthogonal smectic liquid crystals
Source: Royal Society of Chemistry journal article supplement (doi:10.1039/d4sm00295d), 2024-01-01
Supplement: d4sm00295d1.pdf [file d4sm00295d1.pdf]

### Supplementary materials

The code used in this paper can be found at:

[https://github.com/beckythebetts/LC\\_phase\\_classifier.git](https://github.com/beckythebetts/LC_phase_classifier.git)

An example loss plot is shown in supplementary fig.S1.

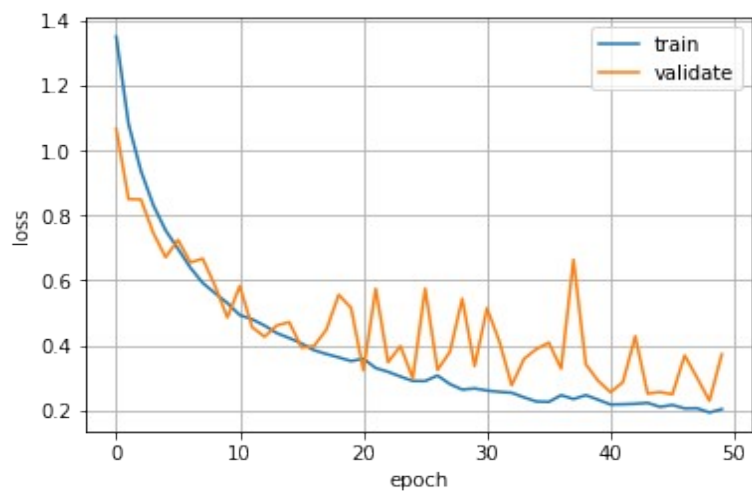

Figure S1: The loss function evaluated at each epoch of training the multiphase inception classifier, for both the training and validation data.
